# Supplementary material for: End-stage renal disease—financial costs and years of life lost in Panama: a cost-analysis study
Source: PubMed Central journal article supplement — BMJ Open. 2019 May 27;9(5):e027229. doi: 10.1136/bmjopen-2018-027229 (PMC6538204; doi:10.1136/bmjopen-2018-027229), 2019-05-27
Supplement: bmjopen-2018-027229supp001.pdf [file bmjopen-2018-027229supp001.pdf]

**Supplementary Table 1. Estimated cost of HD and PD (USD) in CSS, year 2015**

| <b>HD + PD (PUBLIC )</b>             |                     |                            |                          |                         |
|--------------------------------------|---------------------|----------------------------|--------------------------|-------------------------|
|                                      | <b>Monthly cost</b> | <b>Yearly cost/patient</b> | <b>Patients (factor)</b> | <b>Total Cost (USD)</b> |
| PD                                   |                     | 18,766.00                  | 265                      | 4,972,990.00            |
| HD                                   | 1,739.66            | 20,875.92                  | 1746                     | 36,449,356.32           |
| Eritropoyetin                        | 507.00              | 6,084.00                   | 2011                     | 12,234,924.00           |
| Paricalcitol                         | 299.00              | 3,588.00                   | 1423                     | 5,105,724.00            |
| Sevelamer                            | 207.00              | 2,484.00                   | 1751                     | 4,349,484.00            |
| Peritoneal Dialysis                  |                     | 18,766.00                  | 265                      | 4,972,990.00            |
| <b>Total</b>                         |                     |                            |                          | <b>63,112,478.32</b>    |
| National Coordination                |                     | 26,500.00                  | 1                        | 26,500.00               |
| National Coordination (teaching)     |                     | 11,000.00                  | 1                        | 11,000.00               |
| National coordination (personnel)    | 5,982.84            | 71,794.08                  | 1                        | 71,794.08               |
| National Coordination (physicians)   | 10,248.42           | 122,981.04                 | 1                        | 122,981.04              |
| Sub total                            |                     |                            |                          | <b>232,275.12</b>       |
| Nephrologists (salary)               | 62,682.52           | 752,190.24                 | 0.87*                    | 654,405.51              |
| Nephrologists (shifts)               | 41,600.00           | 499,200.00                 | 0.87*                    | 434,304.00              |
| Nephrologists (productivity)         | 2,142.00            | 25,704.00                  | 1                        | 25,704.00               |
| <b>Sub total</b>                     |                     |                            |                          | <b>1,114,413.51</b>     |
| General practitioners (salary)       | 71,029.00           | 852,348.00                 | 1                        | 852,348.00              |
| General practitioners (shifts)       | 19,960.00           | 239,520.00                 | 1                        | 239,520.00              |
| Sub total                            |                     |                            |                          | <b>1,091,868.00</b>     |
| Nurses (salary)                      | 129,680.19          | 1,556,162.28               | 1                        | 1,556,162.28            |
| Nurses (shifts)                      | 37,227.00           | 446,724.00                 | 1                        | 446,724.00              |
| <b>Sub total</b>                     |                     |                            |                          | <b>2,002,886.28</b>     |
| <b>TOTAL (HD+PD)</b>                 |                     |                            |                          | <b>67,553,921.23</b>    |
| <b>Yearly cost / patient (HD+PD)</b> |                     |                            |                          | <b>38,580.19 USD</b>    |

\*Shifts are calculated only for HD (Prevalence of HD =0.87).

*Supplementary Table 2. Estimates Costs of HD (USD) in CETRERSA, year 2015*

| <b>HD (PRIVATE )</b>                                           |                          |                     |                |
|----------------------------------------------------------------|--------------------------|---------------------|----------------|
|                                                                | <b>Monthly cost 2015</b> | <b>Yearly Cost</b>  | <b>Cost/HD</b> |
| <b>Human resources</b>                                         | <b>Private</b>           |                     |                |
| Personal (Nephrologists, General Practitioners, Nurses, etc.)  | <b>123757.00</b>         | <b>1485084.00</b>   | <b>147.86</b>  |
| <b>Subtotal Human Resources</b>                                | <b>123757.00</b>         | <b>1,485,084.00</b> | <b>147.86</b>  |
| <b>Basic Services</b>                                          | <b>Private</b>           |                     |                |
| Water                                                          | 400.00                   | 4,800.00            | 0.48           |
| Electricity                                                    | 3,886.00                 | 46,632.00           | 4.64           |
| <b>Subtotal Basic Services</b>                                 | <b>4,286.00</b>          | <b>51,432.00</b>    | <b>5.12</b>    |
| <b>Travel expenses</b>                                         | <b>Private</b>           |                     |                |
| Food/Travel expenses companions                                | 57.00                    | 684.00              | 0.07           |
| Travel expenses patients                                       | 1605.00                  | 19260.00            | 1.92           |
| <b>Subtotal Travel expenses</b>                                | <b>1,662.00</b>          | <b>19,944.00</b>    | <b>1.99</b>    |
| <b>Infrastructure</b>                                          | <b>Private</b>           |                     |                |
| Maintenance and buildings                                      | 1,235.00                 | 14,820.00           | 1.48           |
| Maintenance of equipment                                       | 7,018.00                 | 84,216.00           | 8.38           |
| Estimation of the use of buildings                             | 29,151.00                | 349,812.00          | 34.83          |
| Equipment utilization                                          | 4,184.00                 | 50,208.00           | 5.00           |
| <b>Subtotal Infrastructure</b>                                 | <b>41,588.00</b>         | <b>499,056.00</b>   | <b>49.69</b>   |
| <b>Materials and supplies</b>                                  | <b>Private</b>           |                     |                |
| Food-patients and human resources                              | 2572.00                  | 30864.00            | 3.07           |
| Cost of clothing: sheets, patient gowns, disposable bed cover, | 3048.00                  | 36576.00            | 3.64           |
| Diesel                                                         | 1026.00                  | 12312.00            | 1.23           |
| Medicines                                                      | 10091.00                 | 121092.00           | 12.06          |
| Pharmaceuticals supplies                                       | 38224.00                 | 458688.00           | 45.67          |
| Cleaning articles                                              | 639.00                   | 7668.00             | 0.76           |
| Laboratories                                                   | 1125.00                  | 13500.00            | 1.34           |
| Office materials                                               | 773.00                   | 9276.00             | 0.92           |
| Surgical Medical Instruments                                   | 4324.00                  | 51888.00            | 5.17           |
| <b>Subtotal Materials and Supplies</b>                         | <b>61,822.00</b>         | <b>741,864.00</b>   | <b>73.86</b>   |
| <b>Machinery and equipment</b>                                 | <b>Private</b>           |                     |                |
| <b>Number of HD</b>                                            |                          |                     | <b>10044</b>   |
| <b>Number of patients</b>                                      |                          |                     | <b>64</b>      |
|                                                                | <b>Monthly cost 2015</b> | <b>Yearly Cost</b>  | <b>Cost/HD</b> |
| <b>Total</b>                                                   | <b>233,115.00</b>        | <b>2,797,380.00</b> | <b>278.51</b>  |

Cost/patient  
43,447.96 USD

**Supplementary Table 3. Years of Life Lost-USD due to CKD mortality below 40 years of age, according to provinces in Panama. Year 2015**

| <b>Province*</b>  | <b>YLLs-USD</b> |
|-------------------|-----------------|
| Panamá            | 1,548,252.11    |
| Coclé             | 459,212.85      |
| Colón             | 314,586.97      |
| Chiriquí          | 301,269.05      |
| Panamá Oeste      | 298,389.39      |
| Emberá Indigenous | 160,991.2       |
| Bocas del Toro    | 152,671.82      |
| Los Santos        | 143,929.82      |

*\* Provinces with recorded deaths due to CKD in the age below 40 years.*
